# Supplementary material
Source: PubMed Central journal article supplement (PMC4276729)
Supplement: NIHMS610220-supplement-Supplemental_Table.pdf [file NIHMS610220-supplement-Supplemental_Table.pdf]

**Supplemental Table SI. Sample Characteristics.**

| Characteristics                 | <u>Administrators (n = 21)</u> |                          | <u>Clinicians (n = 25)</u> |                          | <u>Consumers (n = 66)</u> |                         |
|---------------------------------|--------------------------------|--------------------------|----------------------------|--------------------------|---------------------------|-------------------------|
|                                 | <i>N</i>                       | Mean (SD)/<br>Percentage | <i>N</i>                   | Mean (SD)/<br>Percentage | <i>N</i>                  | Mean(SD)/<br>Percentage |
| Age <sup>a</sup>                | 20                             | 49 (9.4)                 | 25                         | 45 (9.7)                 | 66                        | 50 (12.7)               |
| Women                           | 12                             | 57.1                     | 20                         | 80.0                     | 37                        | 56.1                    |
| Foreign Born                    | 5                              | 23.8                     | 7                          | 38.9                     | 36                        | 54.5                    |
| Race/Ethnicity <sup>b</sup>     |                                |                          |                            |                          |                           |                         |
| Hispanic                        | 3                              | 14.3                     | 10                         | 40.0                     | 37                        | 56.9                    |
| Black/African American          | 2                              | 9.5                      | 4                          | 16.0                     | 22                        | 33.8                    |
| Non-Hispanic White              | 15                             | 71.4                     | 9                          | 36.0                     | 5                         | 7.7                     |
| Other                           | 1                              | 4.8                      | 2                          | 8.0                      | 1                         | 1.5                     |
| Language Fluency <sup>c</sup>   |                                |                          |                            |                          |                           |                         |
| English Only                    | 10                             | 47.6                     | 10                         | 40                       | 22                        | 34.4                    |
| Bilingual                       | 11                             | 52.4                     | 15                         | 60                       | 22                        | 34.4                    |
| Spanish Only                    | 0                              | 0                        | 0                          | 0                        | 20                        | 31.3                    |
| Years of Education <sup>d</sup> |                                |                          |                            |                          |                           |                         |
| Less than 12 years              | 0                              | 0                        | 0                          | 0                        | 22                        | 34.9                    |
| High School Diploma (12 Yrs.)   | 1                              | 4.8                      | 1                          | 4.2                      | 22                        | 34.9                    |
| Beyond High School              | 20                             | 95.2                     | 23                         | 95.8                     | 19                        | 30.2                    |
| Profession/Discipline           |                                |                          |                            |                          |                           |                         |
| Psychiatrist                    | 8                              | 38.1                     | 5                          | 20.0                     |                           |                         |
| Psychologist                    | 6                              | 28.6                     | 5                          | 20.0                     |                           |                         |
| Social Worker                   | 4                              | 19.0                     | 8                          | 32.0                     |                           |                         |
| Nurse                           | 1                              | 4.8                      | 3                          | 12.0                     |                           |                         |
| Other                           | 2                              | 9.5                      | 4                          | 16.0                     |                           |                         |

<sup>a</sup>Administrators, *n* = 20<sup>b</sup>Consumers, *n* = 65<sup>c</sup>Consumers, *n* = 64<sup>d</sup>Clinicians, *n* = 24; consumers, *n* = 63
